## Blood pH and Brain Uptake of <sup>14</sup>C-Morphine

D. S. Schulman, B.A.,\* J. J. Kaufman, Ph.D.,† M. M. Eisenstein, B.A.,‡ S. I. Rapoport, M.D.§

<sup>14</sup>C-Morphine was injected iv in control awake rats or in rats subjected to metabolic alkalosis or acidosis. Ten minutes later, radioactivity was determined within each of seven brain regions, after correction was made for intravascular tracer. In each region, parenchymal radioactivity was correlated positively and significantly ( $P < 0.05$ ) with arterial blood pH. Brain radioactivity was twofold to threefold greater in alkalotic rats (mean pH = 7.62) than in acidotic rats (mean pH = 7.16). The results are consistent with the pH-partition hypothesis for drug entry into the brain and indicate that morphine uptake can be increased by elevating the fraction of lipid-soluble uncharged morphine base in blood, by means of alkalosis. The observations may account for an exaggerated morphine-induced analgesia in alkalotic patients. (Key words: Acid-base equilibrium: acidosis; alkalosis. Analgesics: morphine. Brain: blood-brain barrier. Pharmacokinetics: morphine.)

ANALGESIA caused by morphine or its base analogue, meperidine, is increased during alkalosis. For example, surgical patients given meperidine exhibit exaggerated analgesia during respiratory alkalosis,<sup>1</sup> whereas rats given morphine have a decreased sensitivity to heat-induced pain when alkalotic.<sup>2</sup>

The pH dependence of morphine- or meperidine-induced analgesia may depend on pharmacokinetic and pharmacodynamic factors. Brain regions such as the amygdala, periaqueductal gray matter, and thalamus bind opiates specifically.<sup>3</sup> Their binding to brain is related to lipophilicity and may be pH dependent for a dissociable base such as morphine.¶ On the other hand, according to the pH-partition hypothesis, an alkaline blood pH would be expected to increase brain uptake of morphine by increasing the availability of circulating uncharged base (B), which is about 10<sup>4</sup> times more lipid

soluble and permeant at the blood-brain barrier than the charged form (BH<sup>+</sup>).<sup>1,4-6</sup> Another possibility is that blood pH modifies the rate of morphine glucuronidation or N-demethylation by the liver,<sup>7</sup> but information about this is unavailable. Renal excretion of morphine is influenced by pH,<sup>8,9</sup> and alkalosis is reported to increase the percentage of protein-bound morphine in plasma, which normally approximates 35%.<sup>10</sup>

The relevance of pH to morphine analgesia is highlighted by evidence in anesthetized dogs that brain uptake of morphine is increased by respiratory alkalosis.<sup>11</sup> We thought it of interest, therefore, to examine this issue during experimental metabolic alkalosis and acidosis and used awake rats for our studies.

### Methods

Male adult rats (Osborne-Mendel strain), weighing 250-300 g, were anesthetized with Na pentobarbital (50 mg · kg<sup>-1</sup>, ip), after which indwelling catheters filled with 100 IU Na heparin per milliliter isotonic saline (0.9% [w/v] NaCl) were tied into a femoral artery and vein. Four hours later, when the rats had recovered from anesthesia, blood pH was altered in one of two ways. Metabolic alkalosis was produced by an ip injection of NaHCO<sub>3</sub> (1.2 mg · kg<sup>-1</sup> body weight, in isotonic saline). Metabolic acidosis was caused by iv infusion during 60 minutes of 1.2 milliliters of a solution of NH<sub>4</sub>Cl, in which the NH<sub>4</sub>Cl concentration was adjusted to deliver 535 mg · kg<sup>-1</sup> body weight. Control rats received ip or iv isotonic saline.

Fifteen minutes after the ip injection of NaHCO<sub>3</sub> or of isotonic saline, or at the completion of the 1-h infusion of NH<sub>4</sub>Cl or of isotonic saline, 0.25 ml arterial blood were removed for the determination of pH (pH-Blood Gas Analyzer®, No. 213, Instrumentation Laboratory, Lexington, Massachusetts). The rats then were injected iv with 30 μCi [N-methyl-<sup>14</sup>C]-morphine HCl (sp. act. = 58 mCi · mmol<sup>-1</sup>; Amersham Corporation, Arlington Heights, Illinois) plus 2 mg · kg<sup>-1</sup> unlabeled morphine (Applied Science Laboratories, State College, Pennsylvania), both dissolved in 1 ml isotonic saline. Radiotracer purity was ascertained with thin-layer chromatography, using ethyl acetate:methyl alcohol:H<sub>2</sub>O:NH<sub>4</sub>Cl (85:13.5:1.0:0.5 v/v) as a solvent system and a Whatman® LK5D TLC plate (Bulletin No. 502, Whatman Inc., Clifton, New Jersey). The unlabeled morphine was visualized with ultraviolet light.

After the iv injection of <sup>14</sup>C-morphine plus unlabeled morphine, arterial blood samples were removed at 0.25,

\* Student Investigator, Laboratory of Neurosciences, National Institute on Aging; presently, Medical Student, Albert Einstein College of Medicine.

† Associate Professor, Department of Anesthesiology, Johns Hopkins University School of Medicine; Principal Research Scientist, Department of Chemistry, Johns Hopkins University.

‡ Student Investigator, Department of Anesthesiology, Johns Hopkins University School of Medicine.

§ Chief, Laboratory of Neurosciences, National Institute on Aging, National Institutes of Health.

Received from the Laboratory of Neurosciences, National Institute on Aging, National Institutes of Health, Bethesda, Maryland, and the Department of Anesthesiology, Johns Hopkins University School of Medicine, Baltimore, Maryland. Accepted for publication April 27, 1984.

Address reprint requests to Dr. Rapoport: Laboratory of Neurosciences, National Institute on Aging, National Institutes of Health, Bethesda, Maryland 20205.

¶ Jacobson AE, Klee WA, Dunn WJ III: A quantitative relationship between antinociceptive activity, opiate receptor affinity and lipophilicity. *Eur J Med—Chem Ther* 12:49-52, 1977.

0.5, 1, 2, 3, 5, and 9 min and were centrifuged. Aliquots of plasma and of a 10-min whole blood sample were placed in vials. Ten minutes after the injection, the rat was decapitated, the brain was removed and the pia-arachnoid, large surface vessels and choroid plexus were separated and discarded. Seven brain regions—hippocampus, hypothalamus, thalamus, midbrain, pons, medulla, and caudate nucleus—were dissected out,<sup>12</sup> placed in tared vials, and weighed. The tissue and whole blood samples were dissolved overnight in 1.5 ml Soluene 350® (Packard Instruments Co., Downers Grove, Illinois), after which a scintillation cocktail was added. Plasma samples were dissolved in 13.5 ml Biofluor® (New England Nuclear, Boston, Massachusetts). Radioactivity (dpm) of plasma, blood, and brain was determined by scintillation spectroscopy (Scintillation Spectroscopy No. LS 6800, Beckman Instruments, Inc., Fullerton, California).

Parenchymal brain radioactivity,  $C_{\text{brain}}$  dpm · g<sup>-1</sup>, was calculated by subtracting intravascular brain radioactivity from net measured radioactivity. Intravascular radioactivity was taken as whole blood radioactivity at decapitation, multiplied by 0.02 (estimated intravascular space per gram of brain).<sup>6</sup>

STATISTICS

Values for brain radioactivity and for the integral of arterial plasma radioactivity were correlated with blood pH. Means in control, acidotic, and alkalotic rats were compared by analysis of variance and Bonferroni *t* statistics.<sup>13</sup> Statistical significance was taken at *P* < 0.05.

Results

Figure 1 illustrates data from an experiment in which 30 μCi [N-methyl-<sup>14</sup>C]-morphine HCl (*i.e.*, <sup>14</sup>C-morphine)

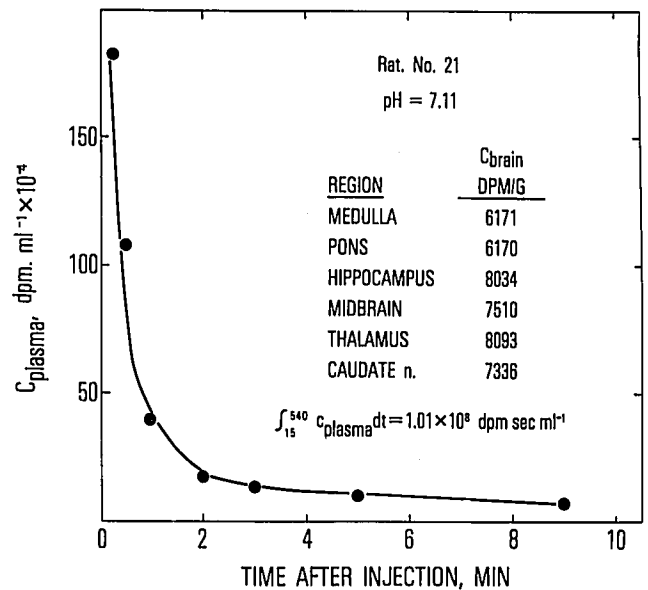

FIG. 1. Plasma and parenchymal brain radioactivities following iv injection of 30 μCi <sup>14</sup>C-morphine in a rat. The animal was killed 10 min after injection, and brain radioactivity was corrected for intravascular tracer. Arterial whole blood pH = 7.11.

was injected iv as a bolus in an awake rat, together with 2 mg · kg<sup>-1</sup> unlabeled morphine. The rat first had been infused for 1 h with NH<sub>4</sub>Cl to reduce arterial blood pH to 7.11. Arterial plasma radioactivity was determined at timed intervals from 0.25 to 9 min following the bolus injection; the integral of plasma radioactivity in this time period equaled 1.009 × 10<sup>8</sup> dpm · s · ml<sup>-1</sup>. The rat was decapitated 10 min after injection, and net brain radioactivity was measured at each of seven regions. The table in the figure provides values for  $C_{\text{brain}}$  (parenchymal brain radioactivity), which were calculated from mea-

TABLE 1. Brain Radioactivity 10 Minutes after iv Injection of 30 μCi <sup>14</sup>C-Morphine in Awake Control, Alkalotic, and Acidotic Rats

| Brain Region    | Arterial Whole Blood pH                                                                |                  |                 | Correlation (r) with pH |
|-----------------|----------------------------------------------------------------------------------------|------------------|-----------------|-------------------------|
|                 | 7.16 ± 0.01 (8)*                                                                       | 7.44 ± 0.01 (10) | 7.62 ± 0.01 (8) |                         |
|                 | $C_{\text{brain}}$ , dpm · mg <sup>-1</sup> × 10 <sup>-3</sup>                         |                  |                 |                         |
| Caudate nucleus | 6.4 ± 0.6†                                                                             | 10.1 ± 1.0†      | 17.5 ± 4.1      | 0.49‡                   |
| Thalamus        | 6.6 ± 0.8†                                                                             | 9.7 ± 0.9†       | 18.4 ± 4.3      | 0.48‡                   |
| Hypothalamus    | 11.8 ± 2.3                                                                             | 17.1 ± 1.2       | 23.2 ± 3.6      | 0.48‡                   |
| Hippocampus     | 6.8 ± 0.8†                                                                             | 12.2 ± 1.1†      | 20.9 ± 4.3      | 0.56‡                   |
| Midbrain        | 7.0 ± 0.7†                                                                             | 12.0 ± 1.0†      | 20.2 ± 4.9      | 0.50‡                   |
| Pons            | 6.2 ± 0.8†                                                                             | 10.9 ± 1.2†      | 18.5 ± 3.7      | 0.55‡                   |
| Medulla         | 7.5 ± 0.9†                                                                             | 13.4 ± 1.4†      | 20.3 ± 3.7†     | 0.57‡                   |
|                 | $\int_{15}^{540} C_{\text{plasma}} dt$ , dpm · s · ml <sup>-1</sup> × 10 <sup>-8</sup> |                  |                 |                         |
|                 | 1.13 ± 0.19                                                                            | 1.41 ± 0.45      | 1.70 ± 0.38     | 0.35                    |

Arterial plasma integrals between 0.25 and 9 min after injection also are given in the table. Mean concentrations were compared with the mean at the hypothalamus, by analysis of variance and Bonferroni *t* statistics.

\* Mean ± SE (number of animals in column).  
† Significantly less than mean at hypothalamus (*P* < 0.05).  
‡ Statistically significant correlation (*P* < 0.05).

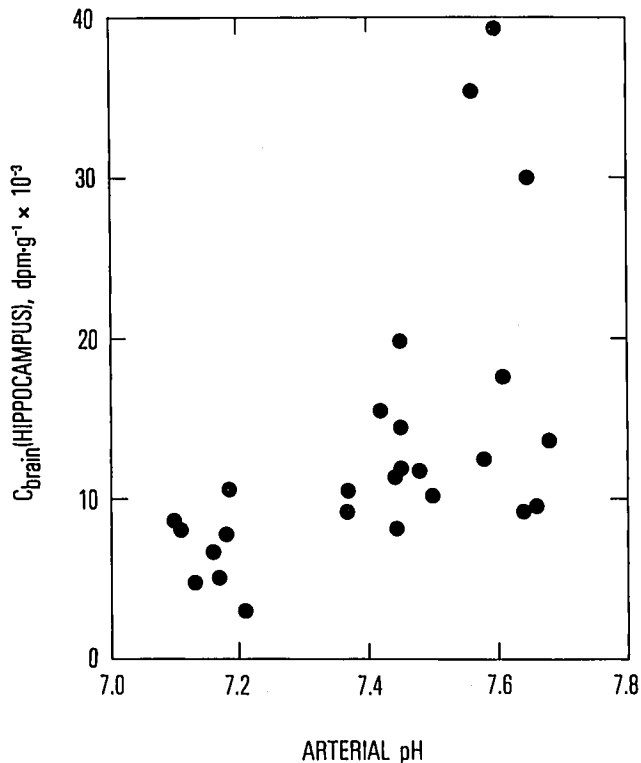

FIG. 2. Relation between  $C_{\text{brain}}$  at the hippocampus and arterial blood  $p\text{H}$ , in rats injected iv with  $^{14}\text{C}$ -morphine. Correlation ( $r$ ) = 0.56 ( $P < 0.05$ ).

sured radioactivities after correction for intravascular tracer (see "methods"). For example,  $C_{\text{brain}}$  at the hippocampus equaled  $8034 \text{ dpm} \cdot \text{g}^{-1}$ .

Table 1 presents mean values for  $C_{\text{brain}}$  at each of the seven regions that were examined, in acidotic animals that were administered  $\text{NH}_4\text{Cl}$  (mean blood  $p\text{H} = 7.16$ ), in control animals (mean  $p\text{H} = 7.44$ ), and in alkalotic animals that were given  $\text{NaHCO}_3$  (mean  $p\text{H} = 7.62$ ). At each region,  $C_{\text{brain}}$  was correlated significantly and positively with arterial  $p\text{H}$ . Analysis of variance and Bonferroni  $t$  statistics demonstrated, furthermore, that brain radioactivity generally was greater in the hypothalamus than in other regions in control rats ( $P < 0.05$ ). Table 1 also lists the mean arterial plasma integrals of radioactivity, between 0.25 and 9 min after iv  $^{14}\text{C}$ -morphine, at each of the three  $p\text{H}$  conditions. The integral was not correlated significantly with arterial  $p\text{H}$ .

Figure 2 relates  $C_{\text{brain}}$  in a representative brain region, the hippocampus, to arterial  $p\text{H}$  in each of 26 experiments, and demonstrates a significant positive correlation between the two parameters ( $r = 0.56$ ). Furthermore, it illustrates a more than threefold difference in normalized brain radioactivity between  $p\text{H}$  7.1 and 7.7.

## Discussion

Brain radioactivity at 10 min after iv injection of  $^{14}\text{C}$ -morphine is correlated positively and significantly with arterial blood  $p\text{H}$  in awake rats. Mean  $C_{\text{brain}}$  is twofold to threefold higher at a mean arterial  $p\text{H}$  of 7.62 than at 7.16. The actual  $p\text{H}$  during the 10 min of the experiment may have been somewhat lower than the measured preinjection value, however, due to respiratory depression and hypercapnia caused by the injection of unlabeled morphine.<sup>14</sup>

The results agree with observations in anesthetized dogs that morphine uptake by brain is increased during respiratory alkalosis<sup>11</sup> and provide one possible explanation for augmented analgesia in response to meperidine or morphine during alkalosis.<sup>1,2,15</sup> These results, and those of Nishitatenno *et al.*,<sup>11</sup> are inconsistent with a report that respiratory acidosis increases brain uptake of morphine in the dog.<sup>16</sup> In the latter case, the increased brain uptake was ascribed to hypercapnia, an elevated cerebral blood flow, and increased delivery of morphine to the brain. This interpretation is unlikely, however. The unidirectional transfer constant at the blood-brain barrier for morphine, equal to  $k_1 = 5 \times 10^{-4} \text{ s}^{-1}$ ,<sup>17</sup> is as low as  $k_1$  for sucrose, an agent that enters the brain very slowly.<sup>5,6,18</sup> Because  $k_1$  for morphine is much less than  $0.023 \text{ s}^{-1}$ , the value for cerebral blood flow in the awake rat,<sup>19</sup> morphine uptake is limited by its diffusion at the blood-brain barrier and is independent of flow.<sup>5,6</sup>

An elevated brain radioactivity during metabolic alkalosis can be explained in part by the  $p\text{H}$ -partition hypothesis for drug action within the central nervous system.<sup>5</sup> The  $pK_a$  of morphine equals 7.93 at  $37^\circ \text{C}$ .<sup>20</sup> Therefore, an increase of mean blood  $p\text{H}$  from 7.16 to 7.62 should increase the percentage of uncharged morphine base (B) in blood from 15% of the net to 33%, or by twofold, approximately equal to the twofold to threefold elevations in brain uptakes noted in this study (table 1). The uncharged base (B) is about  $10^4$  times more lipid soluble than is the charged base  $\text{BH}^+$  and should be proportionately more permeant at the blood-brain barrier.<sup>4,21</sup>

Greater radioactivity in the hypothalamus than in other brain regions could be due to hypothalamic non-barrier sites with leaky capillaries (*e.g.*, circumventricular organs).<sup>5</sup> These sites would allow charged base into the hypothalamus, independently of  $p\text{H}$ , whereas only uncharged morphine could enter regions with an intact barrier in relation to  $p\text{H}$ . The difference between net radioactivity in the hypothalamus and radioactivity in other brain regions therefore would be decreased by alkalosis, as suggested by table 1.

Within the 10 min after the iv injection of  $^{14}\text{C}$ -

morphine, a large fraction of plasma radioactivity is in the form of the radioactive glucuronide.<sup>8,14</sup> As only free morphine enters the brain,<sup>7,11,22</sup> due to the impermeability of the glucuronide at the blood-brain barrier, peripheral pharmacokinetic factors related to pH could modify the availability of free morphine for brain uptake. For example, glucuronidation is accelerated in morphine tolerant animals,<sup>22</sup> but the possible pH dependence of glucuronidation or demethylation is unreported, to our knowledge. The pH gradient between blood and renal tubules also influences renal secretion of unchanged morphine.<sup>8,9</sup> The initial volume of distribution of morphine depends on blood pH, and the plasma fraction of non-protein-bound drug is elevated by alkalosis.<sup>11,19</sup>

$C_{\text{brain}}$  at 10 min after the injection of morphine is at least one tenth of  $C_{\text{plasma}}$  at any time during the 10 min (fig. 1). Even allowing for significant glucuronidation of <sup>14</sup>C-morphine, the plasma/brain gradient for <sup>14</sup>C-morphine is so large during the 10 min that brain radioactivity is due to the unidirectional flux of tracer into brain, with very limited back diffusion from brain.<sup>6,21</sup> This makes it unlikely that brain pH influences the results.<sup>22</sup>

The authors thank Dr. Karen Pettigrew (Theoretical Statistics and Mathematics Branch, National Institute of Mental Health) for statistical analysis of the data.

### References

1. Kaufman JJ, Koski WS, Benson DW, Semo NM: Narcotic and narcotic antagonist  $pK_a$ 's and partition coefficients and their significance in clinical practice. *Drug Alcohol Depend* 1:103-114, 1975/1976
2. Eisenstein MM, Schulman DS, Kaufman JJ, Rogers MC: Morphine effect as a function of pH variations. *ANESTHESIOLOGY* 53:S44, 1980
3. Kuhar MJ, Pert CB, Snyder SH: Regional distribution of opiate receptor binding in monkey and human brain. *Nature* 245:447-450, 1973
4. Hansch C: Quantitative structure-activity relationships in drug design, *Drug Design*, vol 1. Edited by Ariens EJ. New York, Academic Press, 1971, pp 271-342
5. Rapoport SI: Blood-Brain Barrier in Physiology and Medicine. New York, Raven Press, 1976, pp 1-316
6. Rapoport SI, Ohno K, Pettigrew KD: Drug entry into the brain. *Brain Res* 172:354-359, 1979
7. Mullis KB, Perry DC, Finn AM, Stafford B, Sadée W: Morphine persistence in rat brain and serum after single doses. *J Pharmacol Exp Ther* 208:228-231, 1979
8. Brunk SF, Delle, M: Morphine metabolism in man. *Clin Pharmacol Ther* 16:51-57, 1974
9. Milne MD, Scribner BH, Crawford, MA: Non-ionic diffusion and the excretion of weak acids and bases. *Am J Med* 24:709-729, 1958
10. Olsen GD: Morphine binding to human plasma proteins. *Clin Pharmacol Ther* 17:31-35, 1975
11. Nishitaten K, Ngai SH, Finck AD, Berkowitz BA: Pharmacokinetics of morphine: Concentrations in the serum and brain of the dog during hyperventilation. *ANESTHESIOLOGY* 50:520-523, 1979
12. Chiueh CC, Sun CL, Kopin IJ, Fredericks WR, Rapoport SI: Entry of [<sup>3</sup>H]norepinephrine, [<sup>125</sup>I]albumin and Evans blue from blood into brain following unilateral osmotic opening of the blood-brain barrier. *Brain Res* 145:291-301, 1978
13. Miller RG Jr: Simultaneous Statistical Inference. New York, McGraw-Hill, 1966, pp 76-81
14. Hug CC Jr, Murphy MR, Rigel EP, Olson WA: Pharmacokinetics of morphine injected intravenously into the anesthetized dog. *ANESTHESIOLOGY* 54:38-47, 1981
15. Hipps PP, Eveland MR, Meyer ER, Sherman WR, Cicero TJ: Mass fragmentography of morphine: Relationship between brain levels and analgesic activity. *J Pharmacol Exp Ther* 196:642-648, 1976
16. Finck AD, Berkowitz BA, Hempstead J, Ngai SH: Pharmacokinetics of morphine: effects of hypercarbia on serum and brain morphine concentrations in the dog. *ANESTHESIOLOGY* 47:407-410, 1977
17. Dahlström BE, Paalzow LK: Pharmacokinetics of morphine in plasma and discrete areas of the rat brain. *J Pharmacokinetic Biopharm* 3:293-302, 1975
18. Ferguson RK, Woodbury DM: Penetration of <sup>14</sup>C-inulin and <sup>14</sup>C-sucrose into brain, cerebrospinal fluid and skeletal muscle of developing rats. *Exp Brain Res* 7:181-194, 1969
19. Ohno K, Pettigrew KD, Rapoport SI: Local cerebral blood flow in the conscious rat, as measured with <sup>14</sup>C-antipyrine, <sup>14</sup>C-iodoantipyrine and <sup>3</sup>H-nicotine. *Stroke* 10:62-67, 1979
20. Kaufman JJ, Semo NM, Koski WS: Microelectrometric titration measurement of the  $pK_a$ 's and partition and drug distribution coefficients of narcotics and narcotic antagonists and their pH and temperature dependence. *J Med Chem* 18:647-655, 1975
21. Rapoport SI, Levitan H: Neurotoxicity of x-ray contrast media. Relation to lipid solubility and blood-brain barrier permeability. *AJR* 122:186-193, 1974
22. Mulé SJ, Woods LA: Distribution of N-C<sup>14</sup>-methyl labeled morphine: I. In central nervous system of nontolerant and tolerant dogs. *J Pharmacol Exp Ther* 136:232-241, 1962
